1     **Generation of false positive SARS-CoV-2 antigen results with testing conditions outside manufacturer**  
2                     **recommendations: A scientific approach to pandemic misinformation**

3     Glenn Patriquin<sup>1,2</sup>, Ross J. Davidson<sup>1-4</sup>, Todd F. Hatchette<sup>1-4</sup>, Breanne M. Head<sup>5</sup>, Edgard Mejia<sup>5</sup>, Michael G.  
4     Becker<sup>5</sup>, Adrienne Meyers<sup>5</sup>, Paul Sandstrom<sup>5</sup>, Jacob Hatchette<sup>6</sup>, Ava Block<sup>6</sup>, Nicole Smith<sup>6</sup>, John Ross<sup>6</sup>,  
5     Jason J. LeBlanc<sup>1-4\*</sup>

6     <sup>1</sup>Division of Microbiology, Department of Pathology and Laboratory Medicine, Nova Scotia Health (NSH),  
7     Halifax, Nova Scotia, Canada.

8     <sup>2</sup>Department of Pathology, Dalhousie University, Halifax, Nova Scotia, Canada.

9     <sup>3</sup>Department of Medicine (Infectious Diseases), Dalhousie University, Halifax, Nova Scotia, Canada.

10    <sup>4</sup>Department of Microbiology and Immunology, Dalhousie University, Halifax, Nova Scotia, Canada.

11    <sup>5</sup>National Microbiology Laboratory (NML), Public Health Agency of Canada (PHAC), Winnipeg, Manitoba,  
12    Canada.

13    <sup>6</sup>Praxes Medical Group, Halifax, Nova Scotia, Canada.

14    **Key Words:** COVID-19, SARS-CoV-2, antigen, false positive, Panbio

15    **Abstract word count:** 250

16    **Body word count:** 2989

17    **\*Corresponding author:**         Jason J. LeBlanc, PhD, FCCM, D(ABMM)  
18                                             Division of Microbiology, Department of Pathology and Laboratory  
19                                             Medicine, Nova Scotia Health (NSH),  
20                                             Room 404B, MacKenzie Building  
21                                             5788 University Avenue, Halifax, Nova Scotia, B3H 1V8  
22                                             Tel.: +1 902 473 7698; Fax: +1 902 473 7971  
23                                             Email: [jason.leblanc@nshealth.ca](mailto:jason.leblanc@nshealth.ca)

24 **Abstract**

25 **Objectives.** Antigen-based rapid diagnostics tests (Ag-RDTs) are useful tools for SARS-CoV-2 detection.  
26 However, misleading demonstrations of the Abbott Panbio COVID-19 Ag-RDT on social media claimed  
27 that SARS-CoV-2 antigen could be detected in municipal water and food products. To offer a scientific  
28 rebuttal to pandemic misinformation and disinformation, this study explored the impact of using the  
29 Panbio SARS-CoV-2 assay with conditions falling outside of manufacturer recommendations.

30 **Methods.** Using Panbio, various water and food products, laboratory buffers, and SARS-CoV-2-negative  
31 clinical specimens were tested, with and without manufacturer buffer. Additional experiments were  
32 conducted to assess the role of each Panbio buffer component (tricine, NaCl, pH, and tween-20), as well  
33 as the impact of temperatures (4°C, 20°C , and 45°C) and humidity (90%) on assay performance.

34 **Results.** Direct sample testing (without the kit buffer), resulted in false positive signals resembling those  
35 obtained with SARS-CoV-2-positive controls tested under proper conditions. The likely explanation of  
36 these artifacts is non-specific interactions between the SARS-CoV-2-specific conjugated and capture  
37 antibodies, as proteinase K treatment abrogated this phenomenon, and thermal shift assays showed pH-  
38 induced conformational changes under conditions promoting artifact formation. Omitting, altering, and  
39 reverse engineering the kit buffer all supported the importance of maintaining buffering capacity, ionic  
40 strength, and pH for accurate kit function. Interestingly, the Panbio assay could tolerate some extremes  
41 of temperature and humidity outside of manufacturer claims.

42 **Conclusions.** Our data support strict adherence to manufacturer instructions to avoid false positive  
43 SARS-CoV-2 Ag-RDT reactions, otherwise resulting in anxiety, overuse of public health resources, and  
44 dissemination of misinformation.

45

46 **Introduction**

47 High demand for diagnostic testing during the COVID-19 pandemic led to the development of various  
48 technologies for SARS-CoV-2 detection.[1] Nucleic acid amplification tests (NAATs), like real-time RT-  
49 PCR, are considered the reference methods [1-3], but antigen-based rapid diagnostic tests (Ag-RDTs)  
50 have been widely used due to their ease-of use, rapid results, and ability to be performed outside of a  
51 laboratory setting.[1] Many Ag-RDTs have been licensed as point-of-care (POC) devices for SARS-CoV-2  
52 detection [4,5], but their performance can vary between methods, testing frequency, and settings in  
53 which they are used.[6-12] Ag-RDTs are well recognized to be less sensitive and specific than commercial  
54 NAATs, and false positive results from Ag-RDTs are known to occur, particularly in settings of low disease  
55 prevalence.[13,14]

56 The intended use of the COVID-19 Ag Rapid Test Device is qualitative detection of SARS-CoV-2 antigen  
57 (i.e. nucleocapsid protein) from nasal swabs (or nasopharyngeal swabs, depending on the formulation of  
58 the kit). The manufacturer kit insert states that instructions must be strictly followed by a trained  
59 healthcare professional to achieve accurate results, and the kit includes a buffer used for antigen  
60 extraction from the swabs used for specimen collection as well as viral inactivation. However,  
61 misleading demonstrations of a SARS-CoV-2 Ag-RDT (i.e. Panbio) on social media platforms have claimed  
62 that SARS-CoV-2 antigen can readily be detected in municipal water and commercial food and  
63 beverages, if tested directly onto the Panbio test device.[15-18] Moreover, on social media, the misuse  
64 of an Ag-RDT was propagated by pupils in attempts to miss time in school.[15-18] However, in both  
65 these examples, the results are erroneous as direct testing of samples onto the Ag-RDTs device is not  
66 recommended by manufacturer. With misinformation and disinformation often perpetuated on social  
67 media, and aberrant results obtained from improper use of the kit, unsubstantiated claims can  
68 undermine confidence in SARS-CoV-2 diagnostic testing and erode trust in public health efforts. As such,

69 it is important to use science-based approaches to demonstrate that while non-specific reactivity can  
70 occur when testing is performed under inappropriate conditions, SARS-CoV-2 is not truly present in food  
71 or potable water samples. For healthcare professionals, aberrant test results arising from procedures  
72 that deviate from the kit instructions would not be surprising. When manufacturer instructions are  
73 followed, the expected false positivity rate would be very low (i.e. between 0.4 and 1.2%) [6-12], and  
74 the positive Ag-RDTs are often repeated using an alternative method such as a NAAT.[1-3] On the other  
75 hand, the cause of false positive Ag-RDT reactions are rarely investigated.

76 This study deliberately evaluated conditions that fell outside of those recommended by the  
77 manufacturer, which had the potential to generate aberrant Ag-RDT reactions, including unregulated  
78 buffering capacity or ionic strength, and extremes of temperature, humidity, and pH. As expected from  
79 social media claims, direct testing of a wide variety of food products and water samples generated false  
80 positive results with the Panbio Ag-RDT; however, this prompted further investigations into the  
81 underlying mechanism of artifact generation. Panbio kit extraction buffer was omitted, diluted, or  
82 reverse engineered, to help demonstrate the importance of the buffer and each of its components.  
83 Overall, by identifying conditions that could favor artifact generation, this study not only helps provide  
84 evidence supporting the importance of following manufacturer instructions, but helps in the  
85 understanding of possible causes of false positive reactions using Ag-RDTs, which can be informative to  
86 healthcare professionals, test manufacturers, and other users of the products.

## 87 **Materials and methods**

### 88 *Sample types*

89 Ag-RDT samples included food products (Table 1), water, laboratory buffers, specimen transport media,  
90 and four different clinical specimens types previously tested negative by real-time RT-PCR in routine  
91 diagnostic testing: 1) 30 nasopharyngeal (NP) swabs in universal transport media (UTM); 2) 30

92 oropharyngeal and bilateral nares (OP/N) swabs in phosphate buffered saline (PBS) [19,20]; 3) 30  
93 bronchoalveolar lavages (BAL); and 4) 30 saline gargles (Table 1).[21]

#### 94 *Antigen and molecular testing*

95 SARS-CoV-2 nucleocapsid antigen detection was performed using the Abbott Panbio COVID-19 Rapid  
96 Antigen Test (Figure 1) and the BD Veritor System for Rapid Detection of SARS-CoV-2. Each kit's nasal  
97 swabs were dipped into the test samples, placed in the appropriate kit buffers, and 3 or 5 drops were  
98 used to inoculate the sample wells of the Veritor and Panbio cassettes, respectively, as per the  
99 manufacturer recommendations. Each sample was also tested without manufacturer buffer (i.e. direct  
100 sample testing), mirroring the test procedure recommended for clinical specimens. Results were  
101 visualized by the unaided eye after 15 minutes, and Veritor readouts also included automated detection  
102 using a BD Veritor Plus instrument. Panbio test results were based on the kit insert, in which the  
103 presence of the control band alone was considered a negative results, the presence of both the control  
104 and target bands was considered positive, and the presence of the target band alone or absence of  
105 bands was considered invalid (Figure 1). Real-time RT-PCR testing was performed for all specimens  
106 except food products using the Roche Diagnostics cobas SARS-CoV-2 Test on the cobas 6800 instrument.

#### 107 *Assessing the role of the Panbio buffer and its components*

108 PCR-grade water (Invitrogen) was chosen as a representative matrix to generate false positive Panbio  
109 results (Table 1). To assess the assay tolerability to buffer dilution, Panbio buffer was subjected to 2-fold  
110 serial dilutions in PCR-grade water, and testing was performed at 4°C, 20°C, and 37°C (Figure 2A). The  
111 exact composition of Panbio buffer is proprietary, yet according to the product insert, it consists of  
112 tricine, sodium chloride (NaCl), tween-20, proclin 300, and sodium azide (<0.1%). To assess the role of  
113 these components, the buffer was reverse engineered. Solutions of tricine (1 mM to 1M), from pH 3 to

114 12 were prepared (Figure 2B), with or without 1% tween-20. The contribution of ionic strength was  
115 assessed using NaCl (1 mM to 1M) in 100 mM tricine solutions pH 3 to 12 (Figure 2C).

#### 116 *Effect of temperature and humidity on Panbio performance*

117 According to manufacturer specifications, PanBio kits should be stored between 2 to 30 °C, and all kit  
118 components brought to room temperature (15 to 30 °C) for 30 minutes prior to use. To assess the  
119 impact of storage temperature, sealed PanBio test devices were incubated for one hour at 4°C, 20°C or  
120 45°C (Table S1). The 45°C incubations were performed with 90% relative humidity (RH) using a Binder  
121 Constant Climate Chamber (model KBF 115) (Table S1). Test devices were removed from their  
122 packaging, and incubations were repeated under the same conditions. Testing was performed using 20  
123 µL of gamma-irradiated SARS-CoV-2 into 280 µL of PanBio buffer. Viral stocks [at  $1.2 \times 10^6$  plaque  
124 forming units (PFU)/mL] were diluted in PBS (pH = 7.4) to concentrations spanning  $1.2 \times 10^5$  to  $1.1 \times 10^3$   
125 PFU/mL (Table S1). PanBio buffer was used as negative controls. Freeze-thaw effects were investigated  
126 by incubation of test components at -20°C for 16 hours before thawing and testing.

#### 127 *Investigations into possible causes of false positive results*

128 Using "conjugate pad transplantation" (Figure 3A), the proprietary gold conjugated-antibodies of the  
129 Panbio device (i.e. the SARS-CoV-specific human IgG and the chicken IgY used for the control) were  
130 accessed from disassembled Panbio cassettes. Each conjugate pad was resuspended with 100 µl of  
131 Panbio buffer, PCR-grade water, or tricine solutions, and the suspensions were subjected to various  
132 treatments. Proteinase K (PK) (Qiagen GmbH., Hilden, Germany) was used at 100 µg/reaction for one  
133 hour at 56°C, followed by enzyme inactivation at 70°C for 10 minutes (Figure 3B). Untreated and heat  
134 treatment controls were included as controls (Figure 3B). The remaining conjugate-free pads are washed  
135 three times with 1 ml of water or buffer, dried using a Whatman #1 filter, and re-introduced into the  
136 Panbio cassettes. For testing, 25 µl of each water- or buffer-derived conjugated-antibody suspension

137 was added onto the conjugate pads of reassembled cassettes, followed by addition of 5 drops into the  
138 sample well of either positive or negative controls processed in water or the kit buffer.

139 In a second set of experiments (Figure 3A, dashed lines), the control chicken IgY was removed from the  
140 SARS-CoV-2-specific IgG by pre-treatment of the conjugate suspensions with a fragment of the  
141 nitrocellulose membrane from the Panbio test device containing the immobilized mouse monoclonal  
142 anti-chicken IgY. Fragments were excised at approximately 3 mm on each side of the control line  
143 indicated on the Panbio cassette. For each 100  $\mu$ l of conjugate suspension, one fragment was added,  
144 followed by a 15 min incubation at room temperature. Then, SARS-CoV-2-specific conjugated antibody  
145 were removed and subjected to lateral flow and thermal shift assays to explore possible pH-induced  
146 conformational changes (Figure 4).

#### 147 *Conjugated SARS-CoV-2 IgG thermal shift assays*

148 Differential scanning fluorometry (DSF), also known as thermal shift assays, relies on monitoring  
149 temperature-dependent unfolding of a protein, in presence of a fluorescent dye that is quenched in  
150 water but fluoresces when bound to hydrophobic residues.[22-24] As a native protein is unfolded with  
151 heat, different hydrophobic residues are exposed, and the melting temperature ( $T_m$ ) can be calculated  
152 for various test conditions. In this study, 25  $\mu$ l reaction containing 10 $\times$  SYPRO Orange (Invitrogen,  
153 Eugene, Oregon, USA) was added to the gold-conjugated human IgG specific to SARS-CoV-2  
154 resuspended in Panbio buffer or 100 mM of tricine at pH values consistent (i.e. pH 5-7) and inconsistent  
155 (i.e. pH 8-10) with artifact formation (Figure 4A and B). A similar set of experiments with performed with  
156 addition of 1% tween-20. Melting curve analysis was performed by increasing the temperature from  
157 25 $^{\circ}$ C to 99.9 $^{\circ}$ C at a ramp rate of 1% with continuous fluorescence at 610 nm using an Applied  
158 Biosystems 7500 Fast instrument.  $T_m$  values were calculated by manufacturer software (Figure 4B).

## 159 **Results**

160 *False positives in food, water, buffers, media, and clinical specimens*

161 With the exception of soft drinks and some milk products with high fat content which produced negative  
162 or weak false positive reactions, most of the food products that were tested directly onto the Panbio  
163 cassette produced a strong positive SARS-CoV-2 signals that resembled those obtained with the kit  
164 positive control (Table 1). It is interesting that, milk products are often used as blocking agents in  
165 immunoassays to prevent non-specific binding of antibodies.[1,27] Direct testing of known highly acidic  
166 samples caused invalid results for both Panbio and Veritor. All other products were Veritor-negative.  
167 When nasal swabs were used to sample the various products and processing occurred with  
168 manufacturer buffer, no false positives or invalid results were observed.

169 Multiple water samples were evaluated with tested pH values between 4.00 and 9.33, and differences in  
170 supplier-described purification methods, and mineral and electrolyte composition (Table 1). Direct  
171 testing onto Panbio test devices showed strong false positive SARS-CoV-2 signals, while samples diluted  
172 in Panbio buffer did not produce any artifacts. Notably, water samples near the pH of the Panbio buffer  
173 (pH 8.78) also displayed strong false positive signals, suggesting the mechanism behind artifact  
174 formation is not, or not solely, pH-dependent. To investigate the possible roles of buffering capacity and  
175 ionic strength, commonly used laboratory buffers and buffer-containing viral transport media spanning  
176 various pH values (5.62 to 8.78) were tested (Table 1). With the exception of Tris-EDTA (TE), all other  
177 buffers and media generated weakly positive or negative results (Table 1). All water samples, buffers,  
178 and media were RT-PCR and Veritor-negative, suggesting absence of viral RNA and nucleocapsid antigen,  
179 respectively (Table 1).

180 Given that weak false positive were results observed with UTM, PBS, and saline, direct testing was  
181 performed on clinical specimens containing these media and buffers. With direct testing onto Panbio  
182 cassettes, false positive results were seen in 93.3% of NP swabs in UTM, 86.7% of OP/N swabs in PBS,



183 90.0% of BALs, and 90.0% of the saline gargles (Table 1). All specimens were negative when Panbio  
184 buffer was used, which was consistent with the Veritor and RT-PCR results.

#### 185 *Role of the Panbio buffer and its components*

186 Panbio buffer diluted in water at ratios greater than 1:8, and occasionally at 1:10, resulted in artifact  
187 formation (Figure 2A). Similarly, when buffering capacity was poor or lost when using low tricine  
188 concentrations (1 or 10 mM), strong false positive signals were seen across a broad range of pH values  
189 (Figure 2B). In contrast, high tricine concentrations (100 mM or 1M) prevented artifact formation at pH  
190 9 and above, which is consistent with the measured pH of Panbio buffer at 8.78 (Figure 2B and Table 1).  
191 Similar to the buffering capacity, regulated ionic strength also played an important role, as high NaCl  
192 concentrations (100 mM or 1M) reduced or prevented false positive results, whereas lower  
193 concentrations (1 and 10 mM) mirrored NaCl-free conditions (Figures 2B and 2C). Invalid results  
194 sometimes obtained at pH 3 and 12 (Figure 2B and 2C). Tween-20 (1%) was added to all tricine solutions,  
195 but had no impact on results (data not shown). Antimicrobial agents in the Panbio buffer (i.e. proclin  
196 300 and sodium azide) were not investigated due to their unlikely contribution to artifact generation.

#### 197 *Investigations into the mechanism of artifact generation*

198 Following conjugate pad transplantation (Figure 3A), positive and negative control swabs displayed  
199 expected results after inoculation onto re-assembled Panbio cassettes in which resuspended conjugated  
200 antibodies were re-introduced. Water-resuspended conjugated antibody generated a strong false  
201 positive target signal, which was eliminated following PK treatment (Figure 3B). Removal of the gold-  
202 conjugated IgY antibody from the conjugate suspensions did not impair Panbio test performance, and  
203 the strong false positive SARS-CoV-2 signal from water remained (Figure 3C). These findings suggest that  
204 the gold-conjugated human anti-SARS-CoV-2 IgG is responsible for the non-specific interactions with the  
205 immobilized anti-SARS-CoV-2 capture antibody on the test device nitrocellulose membrane. Thermal

206 shift assays in 100 mM tricine solutions were used to compare structural differences of the anti-SARS-  
207 CoV-2 IgG at pH values consistent (i.e. pH 5-7) or inconsistent (i.e. pH 8-10) with artifact formation  
208 (Figure 4A and B). T<sub>m</sub> values were significantly different in tricine solutions between pH 5 to 7 (at 68.4 ±  
209 2.6, 71.4 ± 1.2, 72.5 ± 1.0, respectively) compared to pH 8 to 10 (at 75.6 ± 1.0, 76.8 ± 1.1 and 77.6 ± 1.4,  
210 respectively) (Figure 4A and B). T<sub>m</sub> values at pH 4 and 11 were inconsistent, while no T<sub>m</sub> values could be  
211 established at pH 3 and 12. Of note, the Panbio buffer could not be used directly for thermal shift  
212 experiments, due to high background fluorescence with SYPRO orange. The cause of this background  
213 fluorescence was revealed in tricine solutions containing 1% Tween-20, which demonstrated similar  
214 interference.

#### 215 *Impact of heat and humidity on Panbio kit function*

216 In all test conditions evaluated (Table S1), no deleterious effects on test sensitivity or specificity were  
217 observed concerning temperature or humidity. In a complimentary series of experiments, Panbio buffer  
218 dilutions showed similar findings, regardless of operating temperature (Figure 2A).

#### 219 **Discussion**

220 False positive and negative results occur with any diagnostic test, but are increasingly likely when  
221 manufacturer recommendations are not followed.[1,13,14] This study demonstrated in absence of  
222 manufacturer buffer, a variety of food, water, laboratory buffer, specimen transport media, and clinical  
223 specimens resulted in false positive reactions with the Panbio Ag-RDT. These data are consistent with  
224 others [25] who recognized the importance of Ag-RDT kit buffers. On the other hand, false negative  
225 results would typically be expected with aberrant test conditions. The generation of false positive signals  
226 demonstrated in this study prompted an investigation into the underlying causes of this phenomenon.  
227 Uncontrolled conditions of pH, buffering capacity, and ionic strength, all favored artifact generation,  
228 whereas temperature and humidity were not contributory under the tested parameters. In review of the

229 literature, possible causes of false positive Ag-RDT results include cross-reactions [26], interfering  
230 substances [27], and improper operating or storage conditions for temperature or humidity.[28]. Cross-  
231 reacting or interfering substances common to all samples tested in the study is unlikely. Temperature  
232 extremes have been shown to induce conformational changes in SARS-CoV-2 antibodies, leading to non-  
233 specific binding [29]; however, in this study, Panbio was unaffected by temperature and humidity  
234 conditions evaluated. As described below, the most likely cause of Panbio false positive results was  
235 aberrant protein-protein interactions faced with improper buffer conditions, ionic strength, or pH.

236 In a previous study [25], 20 of 27 of the malaria Ag-RDTs brands evaluated showed false positive  
237 reactions when the manufacturer buffer was replaced with saline, tap water, or distilled water. Distilled  
238 water alone generated false positive reactions [25], similar to what was observed in this study with  
239 Panbio (Table 1). Possible explanations for their findings included inefficient resuspension of blocking  
240 agents, altered capillary flow rates and decreased flushing of contaminating substances, and finally, non-  
241 specific interactions between the conjugated and capture antibodies faced with uncontrolled buffering  
242 and ionic strength conditions.[25] Tricine is a zwitterionic amino acid with a pKa of 8.26, and would be  
243 negatively charged at the measured pH of 8.78 in the Panbio buffer. Therefore, under recommended  
244 testing conditions, tricine may mask positively charged residues on the SARS-CoV-2-specific conjugated  
245 and capture antibodies, while uncontrolled buffer conditions would favor aberrant electrostatic or  
246 hydrophobic interactions between the two antibodies, resulting in false positive results. Supporting this  
247 theory, PK treatment eliminated the false positive Panbio results generated by water, and the  
248 propensity to generate this artifact varied with buffering capacity, pH, and ionic strength. Removal of  
249 the gold-conjugated chicken IgY (used for control band detection) did not alter formation of the SARS-  
250 CoV-2 target artifact formation, suggesting the conjugated SARS-CoV-2-specific IgG alone is responsible  
251 for artifact formation through non-specific binding to the SARS-CoV-2-specific capture antibody  
252 immobilized on the nitrocellulose membrane (Figure 1B). Finally, thermal shift assays were performed

253 on the conjugated anti-SARS-CoV-2 IgG, and pH-dependent conformation changes were observed under  
254 conditions causing false positive results or not (Figure 4). This study was not able to further investigate  
255 pH-dependent binding interactions between the conjugated and capture anti-SARS-CoV-2 antibodies, as  
256 the latter is immobilised on the nitrocellulose membrane, and not available in an unfixed formulation  
257 due to the proprietary nature of the Panbio assay.

258 False positive reactions with the Panbio Ag-RDT have the potential to cause a significant impact to Public  
259 Health. To date, over 200 million Panbio Ag-RDT tests have been distributed to over 120 countries  
260 worldwide, for use in healthcare settings, businesses, or home self-testing. In low prevalence  
261 populations, positive Ag-RDTs are typically confirmed by clinical laboratories with NAATs, thereby  
262 limiting the overall public health impact of the possible artifacts described in this study.[1-3] However, in  
263 programs where home self-testing kits are deployed [20,21,30], it is important to educate users on the  
264 importance of strict adherence to manufacturer instructions. Another area for consideration is outdoor  
265 testing strategies (e.g. drive-thru testing), where the Panbio kit supplies may be exposed to precipitation  
266 and fluctuations in temperature and humidity.[30] While temperature and humidity did not alter the  
267 Panbio performance in this study, rain water was shown to cause false positive reactions if processed  
268 without buffer. Haage et al. [28] demonstrated that prolonged exposure to elevated temperatures  
269 affected the sensitivity of SARS-CoV-2 detection by some Ag-RDTs, whereas low temperatures impaired  
270 specificity of assays including Panbio.[25] However, an alternative explanation for the false positives  
271 observed at low temperatures by these investigators could be the use non-validated specimen types (i.e.  
272 NP swabs in PBS).[25] In this study, PBS alone caused false positive results in absence of buffer. The  
273 quantity of PBS material (i.e. 20 µl in approximately 300 µl of buffer) used by Haage et al. [25] was  
274 similar to the limit of tolerability of Panbio to dilution in water observed in this study of between 1:8 to  
275 1:10.

276 It should be noted that the findings of this study with false positives results observed with Panbio when  
277 tested outside manufacturer claims should not be extrapolated to other Ag-RDTs without supporting  
278 evidence, as a second SARS-CoV-2 antigen test (i.e. BD Veritor) did not show similar findings. Other Ag-  
279 RDTs could rely on different assay principles, and would need to be investigated independently.

280 Overall, this manuscript provides rigorous scientific evidence that erroneous false positive SARS-CoV-2  
281 results can occur with improper test conditions with the Panbio Ag-RDT, resulting in non-specific  
282 interaction between the SARS-CoV-2-specific conjugated and capture antibodies. While generation of  
283 false positive results from direct testing of products onto Panbio Ag-RDT devices may not surprise some  
284 healthcare professionals, having a better understanding of the importance of the buffer and its  
285 components, as well as knowing the mechanism of false positive generation, can help dispute unsound  
286 demonstrations on social media, and help inform users on the value of following the manufacturer  
287 instructions.

## 288 **Acknowledgement**

289 The authors would like to thank the Special Pathogens Program of the National Microbiology Laboratory  
290 (NML) (Winnipeg, MB) for the gamma-irradiated SARS-CoV-2 virus used in this study. We would also like  
291 to recognize the ongoing efforts of the all the NML and NSH staff for their dedication and exceptional  
292 services throughout the pandemic, including the help with RT-PCR testing during this evaluation. The  
293 authors would also like to thank all the volunteers and healthcare professionals who dedicate their time  
294 at popup clinics and other settings that use Ag-RDTs or NAATs. You are all instrumental for our  
295 pandemic responses, and safety in our communities.

## 296 **Author contributions**

297 JH, AB, NS, and JR identified this phenomenon, and were involved in food sample testing. JL, RD, GP, and  
298 TH designed and undertook testing of water, buffer, media, and gargles. JL designed and performed the  
299 buffer reverse engineering, conjugate pad transplanted, PK experiments and DSF experiments. MB,  
300 AM, EM, BH, and PS designed and performed the temperature and humidity experiments. GP, JL, and TH  
301 wrote the initial draft of the manuscript, with all authors contributing to the final version.

## 302 **Transparency declaration**

303 The authors declare that they have no conflicts of interest. This work received no private or public  
304 funding, with the exception of the Panbio kits that were provided in-kind from the Public Health Agency  
305 of Canada (PHAC).

## 306 **Ethics**

307 This evaluation was deemed exempt from Nova Scotia Health Research Ethics Board approval, as the  
308 activities described in this manuscript were conducted in fulfillment of ongoing verification of SARS-CoV-  
309 2 diagnostic assays used in Nova Scotia, and are therefore considered a quality assurance initiative.  
310 Clinical specimens tested were obtained from anonymized residual samples collected for routine  
311 diagnostic testing for SARS-CoV-2 from consenting participants, and all data related to clinical specimens  
312 were provided anonymized, de-identified, and were used solely with the intent to evaluate the potential  
313 for false positives in these clinical specimen types for rapid antigen testing programs used in Nova  
314 Scotia.

## 315 **References**

316 1. Safiabadi Tali SH, LeBlanc JJ, Sadiq Z, Oyewunmi OD, Camargo C, Nikpour B, Armanfard N, Sagan SM,  
317 Jahanshahi-Anbuhi S. 2021. Tools and techniques for severe acute respiratory syndrome coronavirus

- 318 2 (SARS-CoV-2)/COVID-19 detection. Clin Microbiol Rev. 34(3):e00228-20. doi: 10.1128/CMR.00228-  
319 20. PMID: 33980687.
- 320 2. Public Health Agency of Canada (PHAC). 2020. Interim guidance on the use of rapid antigen  
321 detection tests for the identification of SARS-CoV-2 infection. [https://www.canada.ca/en/public-](https://www.canada.ca/en/public-health/services/diseases/2019-novel-coronavirus-infection/guidance-documents/use-rapid-antigen-detection-tests.html)  
322 [health/services/diseases/2019-novel-coronavirus-infection/guidance-documents/use-rapid-antigen-](https://www.canada.ca/en/public-health/services/diseases/2019-novel-coronavirus-infection/guidance-documents/use-rapid-antigen-detection-tests.html)  
323 [detection-tests.html](https://www.canada.ca/en/public-health/services/diseases/2019-novel-coronavirus-infection/guidance-documents/use-rapid-antigen-detection-tests.html) [last accessed September 9, 2021].
- 324 3. World Health Organization (WHO). 2020. Antigen-detection in the diagnosis of SARS-CoV-2 infection  
325 using rapid immunoassays. Interim guidance. [https://www.who.int/publications/i/item/antigen-](https://www.who.int/publications/i/item/antigen-detection-in-the-diagnosis-of-sars-cov-2-infection-using-rapid-immunoassays)  
326 [detection-in-the-diagnosis-of-sars-cov-2-infection-using-rapid-immunoassays](https://www.who.int/publications/i/item/antigen-detection-in-the-diagnosis-of-sars-cov-2-infection-using-rapid-immunoassays) [last accessed  
327 [September 9, 2021](https://www.who.int/publications/i/item/antigen-detection-in-the-diagnosis-of-sars-cov-2-infection-using-rapid-immunoassays)].
- 328 4. US Food and Drug Administration. 2020. In vitro diagnostics EUAs. [https://www.fda.gov/medical-](https://www.fda.gov/medical-devices/coronavirus-disease-2019-covid-19-emergency-use-authorizations-medical-devices/vitro-diagnostics-euas#individual-molecular)  
329 [devices/coronavirus-disease-2019-covid-19-emergency-use-authorizations-medical-devices/vitro-](https://www.fda.gov/medical-devices/coronavirus-disease-2019-covid-19-emergency-use-authorizations-medical-devices/vitro-diagnostics-euas#individual-molecular)  
330 [diagnostics-euas#individual-molecular](https://www.fda.gov/medical-devices/coronavirus-disease-2019-covid-19-emergency-use-authorizations-medical-devices/vitro-diagnostics-euas#individual-molecular) [last accessed September 9, 2021].
- 331 5. Health Canada. 2020. Authorized medical devices for uses related to COVID-19: List of authorized  
332 testing devices. [https://www.canada.ca/en/health-canada/services/drugs-health-products/covid19-](https://www.canada.ca/en/health-canada/services/drugs-health-products/covid19-industry/medical-devices/authorized/list.html)  
333 [industry/medical-devices/authorized/list.html](https://www.canada.ca/en/health-canada/services/drugs-health-products/covid19-industry/medical-devices/authorized/list.html) [last accessed September 9, 2021].
- 334 6. Patriquin G, LeBlanc JJ. SARS-CoV-2 sensitivity limbo - How low can we go? Int J Infect Dis. 2021  
335 Feb;103:23-24. doi: 10.1016/j.ijid.2020.11.138. Epub 2020 Nov 17. PMID: 33212261; PMCID:  
336 PMC7669480.
- 337 7. Linares M, Pérez-Tanoira R, Carrero A, Romanyk J, Pérez-García F, Gómez-Herruz P, Arroyo T,  
338 Cuadros J. 2020. Panbio antigen rapid test is reliable to diagnose SARS-CoV-2 infection in the first 7  
339 days after the onset of symptoms. J Clin Virol. 133:104659. doi: 10.1016/j.jcv.2020.104659. Epub  
340 2020 Oct 16. PMID: 33160179; PMCID: PMC7561603.

- 341 8. Scheiblauer H, Filomena A, Nitsche A, Puyskens A, Corman VM, Drosten C, Zwirgmaier K, Lange C,  
342 Emmerich P, Müller M, Knauer O, Nübling CM. 2021. Comparative sensitivity evaluation for 122  
343 CE-marked SARS-CoV-2 antigen rapid tests. medRxiv 2021.05.11.21257016; doi:  
344 <https://doi.org/10.1101/2021.05.11.21257016>
- 345 9. Gremmels H, Winkel BMF, Schuurman R, Rosingh A, Rigter NAM, Rodriguez O, Ubijaan J, Wensing  
346 AMJ, Bonten MJM, Hofstra LM. 2021. Real-life validation of the Panbio COVID-19 antigen rapid test  
347 (Abbott) in community-dwelling subjects with symptoms of potential SARS-CoV-2 infection.  
348 *EClinicalMedicine* 31:100677. <https://doi.org/10.1016/j.eclinm.2020.100677>.
- 349 10. Merino P, Guinea J, Muñoz-Gallego I, González-Donapetry P, Galán JC, Antona N, Cilla G, Hernández-  
350 Crespo S, Díaz-de Tuesta JL, Gual-de Torrella A, González-Romo F, Escribano P, Sánchez-Castellano  
351 MÁ, Sota-Busselo M, Delgado-Iribarren A, García J, Cantón R, Muñoz P, Folgueira MD, Cuenca-  
352 Estrella M, Oteo-Iglesias J; Spanish Panbio™ COVID-19 validation group. 2021. Multicenter  
353 evaluation of the Panbio COVID-19 rapid antigen-detection test for the diagnosis of SARS-CoV-2  
354 infection. *Clin Microbiol Infect*. 27(5):758-61. doi: 10.1016/j.cmi.2021.02.001. Epub ahead of print.  
355 PMID: 33601009; PMCID: PMC7884234.
- 356 11. Albert E, Torres I, Bueno F, Huntley D, Molla E, Fernández-Fuentes MÁ, Martínez M, Poujois S,  
357 Forqué L, Valdivia A, Solano de la Asunción C, Ferrer J, Colomina J, Navarro D. 2021. Field evaluation  
358 of a rapid antigen test (Panbio COVID-19 Ag Rapid Test Device) for COVID-19 diagnosis in primary  
359 healthcare centres. *Clin Microbiol Infect*. 27(3):472.e7-472.e10. doi: 10.1016/j.cmi.2020.11.004.  
360 Epub 2020 Nov 13. PMID: 33189872; PMCID: PMC7662075.
- 361 12. Stokes W, Berenger BM, Portnoy D, Scott B, Szelewicki J, Singh T, Venner AA, Turnbull L, Pabbaraju  
362 K, Shokoples S, Wong AA, Gill K, Guttridge T, Proctor D, Hu J, Tipples G. 2021. Clinical performance of  
363 the Abbott Panbio with nasopharyngeal, throat, and saliva swabs among symptomatic individuals



- 364 with COVID-19. *Eur J Clin Microbiol Infect Dis*. 20:1-6. doi: 10.1007/s10096-021-04202-9. Epub  
365 ahead of print. PMID: 33742322; PMCID: PMC7979467.
- 366 13. Food and Drug Administration (FDA). 2020. Potential for false positive results with antigen tests for  
367 rapid detection of SARS-CoV-2 - Letter to clinical laboratory staff and health care providers.  
368 [https://www.fda.gov/medical-devices/letters-health-care-providers/potential-false-positive-results-](https://www.fda.gov/medical-devices/letters-health-care-providers/potential-false-positive-results-antigen-tests-rapid-detection-sars-cov-2-letter-clinical-laboratory)  
369 [antigen-tests-rapid-detection-sars-cov-2-letter-clinical-laboratory](https://www.fda.gov/medical-devices/letters-health-care-providers/potential-false-positive-results-antigen-tests-rapid-detection-sars-cov-2-letter-clinical-laboratory) (accessed June 21, 2021).
- 370 14. Nikolayevskyy V, Drobniewski F. 2020. False-positive COVID-19 results: hidden problems and costs.  
371 *Lancet Respir Med*. 8(12):1167-1168. doi: 10.1016/S2213-2600(20)30453-7. Epub 2020 Sep 29.  
372 PMID: 33007240; PMCID: PMC7524437.
- 373 15. The British Broadcasting Corporation (BBC). How children are spoofing Covid-19 tests with soft  
374 drinks. July 5, 2021. [https://www.bbc.com/future/article/20210705-how-children-are-spoofing-](https://www.bbc.com/future/article/20210705-how-children-are-spoofing-covid-19-tests-with-soft-drinks)  
375 [covid-19-tests-with-soft-drinks](https://www.bbc.com/future/article/20210705-how-children-are-spoofing-covid-19-tests-with-soft-drinks). [last accessed September 9, 2021].
- 376 16. The Guardian. UK pupils use orange juice to fake 'positive' Covid test results. July 2, 2021.  
377 [https://www.theguardian.com/world/2021/jul/02/uk-pupils-orange-juice-fake-positive-covid-test-](https://www.theguardian.com/world/2021/jul/02/uk-pupils-orange-juice-fake-positive-covid-test-results)  
378 [results](https://www.theguardian.com/world/2021/jul/02/uk-pupils-orange-juice-fake-positive-covid-test-results) [last accessed September 9, 2021].
- 379 17. Newsweek. School kids using orange juice to get false positive COVID test results. June 6, 2021.  
380 [https://www.newsweek.com/school-kids-orange-juice-get-false-positive-covid-tests-](https://www.newsweek.com/school-kids-orange-juice-get-false-positive-covid-tests-1604118?amp=1)  
381 [1604118?amp=1](https://www.newsweek.com/school-kids-orange-juice-get-false-positive-covid-tests-1604118?amp=1) [last accessed September 9, 2021].
- 382 18. iNews. Teenagers are figuring out how to fake positive Covid tests using lemon juice and hacks from  
383 TikTok. July 1, 2021. [https://inews.co.uk/news/technology/tiktok-fake-covid-positive-test-schools-](https://inews.co.uk/news/technology/tiktok-fake-covid-positive-test-schools-1079693)  
384 [1079693](https://inews.co.uk/news/technology/tiktok-fake-covid-positive-test-schools-1079693) [last accessed September 9, 2021].
- 385 19. LeBlanc JJ, Heinsteinst C, MacDonald J, Pettipas J, Hatchette TF, Patriquin G. 2020. A combined  
386 oropharyngeal/nares swab is a suitable alternative to nasopharyngeal swabs for the detection of

- 387 SARS-CoV-2. *J Clin Virol.* 128:104442. doi: 10.1016/j.jcv.2020.104442. Epub 2020 May 16. PMID:  
388 32540034; PMCID: PMC7228872.
- 389 20. Patriquin G, Davis I, Heinstein C, MacDonald J, Hatchette TF, LeBlanc JJ. 2020. Exploring alternative  
390 swabs for use in SARS-CoV-2 detection from the oropharynx and anterior nares. *J Virol Methods.*  
391 285:113948. doi: 10.1016/j.jviromet.2020.113948. Epub 2020 Aug 9. PMID: 32783913; PMCID:  
392 PMC7415171.
- 393 21. LeBlanc JJ, Pettipas J, Di Quinzio M, Hatchette TF, Patriquin G. 2021. Reliable detection of SARS-CoV-  
394 2 with patient-collected swabs and saline gargles: A three-headed comparison on multiple molecular  
395 platforms. *Journal of Virological Methods* 295:114184. doi: 10.1016/j.jviromet.2021.114184. Epub  
396 ahead of print. PMID: 34029634; PMCID: PMC8141269.
- 397 22. Davey L, Cohen A, LeBlanc J, Halperin SA, Lee SF. 2016. The disulfide oxidoreductase SdbA is active in  
398 *Streptococcus gordonii* using a single C-terminal cysteine of the CXXC motif. *Mol Microbiol.*  
399 99(2):236-53. doi: 10.1111/mmi.13227. Epub 2015 Oct 30. PMID: 26395460.
- 400 23. Gao K, Oerlemans R, Groves MR. 2020. Theory and applications of differential scanning fluorimetry  
401 in early-stage drug discovery. *Biophys Rev.* 12(1):85-104. doi: 10.1007/s12551-020-00619-2. Epub  
402 2020 Jan 31. PMID: 32006251; PMCID: PMC7040159.
- 403 24. Ramu T, Prasad ME, Connors E, Mishra A, Thomassin JL, LeBlanc JJ, Rainey JK, Thomas NA. 2013. A  
404 novel C-terminal region within the multicargo type III secretion chaperone CesT contributes to  
405 effector secretion. *J Bacteriol.* 195(4):740-56. doi: 10.1128/JB.01967-12. Epub 2012 Dec 7. PMID:  
406 23222727; PMCID: PMC3562101.
- 407 25. Gillet P, Mori M, Van den Ende J, Jacobs J. 2010. Buffer substitution in malaria rapid diagnostic tests  
408 causes false-positive results. *Malar J.* 9:215. doi: 10.1186/1475-2875-9-215. PMID: 20650003;  
409 PMCID: PMC3224932.

- 410 26. Wanji S, Amvongo-Adjia N, Njouendou AJ, Kengne-Ouafo JA, Ndongmo WP, Fombad FF, Koudou B,  
411 Enyong PA, Bockarie M. 2016. Further evidence of the cross-reactivity of the Binax NOW Filariasis  
412 ICT cards to non-Wuchereria bancrofti filariae: experimental studies with Loa loa and Onchocerca  
413 ochengi. *Parasit Vectors*. 9:267. doi: 10.1186/s13071-016-1556-8. PMID: 27151313; PMCID:  
414 PMC4858834.
- 415 27. Selby C. 1999. Interference in immunoassay. *Ann Clin Biochem*. 36(6):704-21. doi:  
416 10.1177/000456329903600603. PMID: 10586307.
- 417 28. Haage V, Ferreira de Oliveira-Filho E, Moreira-Soto A, Kühne A, Fischer C, Sacks JA, Corman VM,  
418 Müller MA, Drosten C, Drexler JF. 2021. Impaired performance of SARS-CoV-2 antigen-detecting  
419 rapid diagnostic tests at elevated and low temperatures. *J Clin Virol*. 138:104796. doi:  
420 10.1016/j.jcv.2021.104796. Epub 2021 Mar 16. PMID: 33773413; PMCID: PMC7962993.
- 421 29. Lin J, Dai W, Li W, Xiao L, Luo T, Guo Y, Yang Y, Han Y, Zhu P, Wu Q, He B, Wu J, Xia X. 2021. Potential  
422 false-positive and false-negative results for COVID-19 IgG/IgM antibody testing after heat-  
423 inactivation. *Front Med (Lausanne)*. 7:589080. doi: 10.3389/fmed.2020.589080. PMID: 33537325;  
424 PMCID: PMC7849051.
- 425 30. Siegler AJ, Hall E, Luisi N, Zlotorzynska M, Wilde G, Sanchez T, Bradley H, Sullivan PS. 2020.  
426 Willingness to seek diagnostic testing for SARS-CoV-2 with home, drive-through, and clinic-based  
427 specimen collection locations. *Open Forum Infect Dis*. 7(7):ofaa269. doi: 10.1093/ofid/ofaa269.  
428 PMID: 32704517; PMCID: PMC7337815.

429

430

431

432

433 **Figure legends**

434 **Figure 1.** Summary and principle of the Panbio COVID-19 Ag Rapid Test Device. A) Panbio kit  
435 components and summary of the test procedure. The Panbio kit is designed for detection of SARS-CoV-2  
436 antigen (i.e. nucleocapsid protein, or N protein). Following specimen collection, the swab is placed into  
437 an extraction tube pre-filled with 11-12 drops, or 300  $\mu$ l) of buffer, and the tube cap is added. The tube  
438 is pinched to help extract the respiratory secretions from the swab, which in turn is rotated into the  
439 buffer. The nozzle cap is removed from the extraction tube, and 5 drops are placed into the sample well  
440 of the Panbio lateral flow device. After 15-20 minutes, the results are read and interpreted as depicted.  
441 B) The principle of the Panbio Ag-RDT relies on a nitrocellulose membrane pre-coated with anti-chicken  
442 IgY at the control line, and an anti-SARS-CoV-2 specific antibody at the test line. When the  
443 buffer/specimen solution is added to the sample well, the liquid flows progressively through the device  
444 using capillary action be sequentially flowing through the sample pad, the conjugate pad, the  
445 nitrocellulose membrane, and eventually into the wick. As the liquid comes into contact with the  
446 conjugate pad, both conjugated antibodies are resuspended (i.e. the gold-conjugated chicken IgY and  
447 the gold-conjugated human IgG specific to SARS-CoV-2). In absence of SARS-CoV-2 antigen (i.e. N  
448 protein), the conjugated anti-SARS-CoV-2 antibody will not interact with the anti-SARS-CoV-2 capture  
449 antibody at the test line; however, the conjugated chicken IgY will be captured by the anti-chicken IgY  
450 immobilized at the control line. This generates a red-colored band that can be visualized. In presence of  
451 SARS-CoV-2 antigen, a similar reaction occurs at the test line due to the interaction between the antigen  
452 and the conjugated and capture anti-SARS-CoV-2 antibodies. As seen in this study, false positives can  
453 occur with testing conditions falling outside of the manufacturer instructions, depicted here as non-  
454 specific interactions between the conjugated and capture anti-SARS-CoV-2 antibodies in absence of  
455 antigen.

456 **Figure 2.** False positives SARS-CoV-2 Ag-RDT results can occur from Panbio buffer absence, dilution, or  
457 alterations. A) Artifact generation by Panbio buffer dilution in PCR-grade water at different  
458 temperatures (4°C, 25°C, and 37°C). B) False positives SARS-CoV-2 Ag-RDT results occurrence from  
459 uncontrolled pH and buffering conditions, or C) from changes in ionic strength from NaCl. All  
460 experiments were performed in absence of SARS-CoV-2 antigen. False positive reactions are indicated as  
461 POS (in red) under each Ag-RDT result.

462 **Figure 3.** Impact of proteinase K (PK) and heat treatment on the conjugated SARS-CoV-2 antibody. A)  
463 Conjugate pad transplantation was used to access and investigate properties of the proprietary Panbio  
464 conjugated antibodies. Each step was followed to as depicted leading to treatment of the conjugated  
465 antibodies with proteinase K (PK) or heat (T°C), and comparisons were made with untreated controls  
466 (none). In some experiments (dashed arrows), the gold-conjugated antibody suspensions were pre-  
467 treated with mouse anti-chicken IgY (obtained from a fragment of the nitrocellulose membrane at the  
468 control line) to purify the gold-conjugated human IgG specific for SARS-CoV-2 conjugated antibody. This  
469 suspension was used for subsequent lateral flow and thermal shift assays. B) PK and heat treatments of  
470 the conjugated antibodies. Using conjugate pad transplantation, gold-conjugated antibody suspensions  
471 in Panbio buffer or water were treated for an hour with PK at 56°C, followed by heat inactivation of PK  
472 at 70°C for 10 min. Following re-introduction into Panbio cassettes of conjugated antibodies that were  
473 untreated (none), heat-treated (T°C), or PK-treated, and water was inoculated in the sample well. C)  
474 Removal of the conjugated chicken IgY from the conjugated antibody suspensions, to purify the  
475 conjugated SARS-CoV-2-specific antibody. Untreated (none) or pre-treatment (-IgY) are depicted for  
476 reassembled Panbio cassettes containing the purified conjugated SARS-CoV-2-specific antibody, which  
477 was then inoculated with PCR-grade water. For B) and C), similar reactions as performed for water were  
478 undertaken with positive or negative control swab, to demonstrate the method did not impact  
479 conjugate antibody function.

480 **Figure 4.** Thermal shift profiles for the Panbio gold-conjugated human IgG specific to SARS-CoV-2 at  
481 different pH values. All reactions were performed in 100 mM tricine, and representative thermal shift  
482 profiles are presented in A). Melting temperatures ( $T_m$ ) changes based on pH are summarized in B), as  
483 well as a summary of which conditions were consistent (i.e. pH 5 to 7) or inconsistent (i.e. pH 8-10) with  
484 generation of false positive results when tested by Ag-RDT.

485

486

487

1 **Table 1.** Samples tested by SARS-CoV-2 Ag-RDTs with and without manufacturer buffer.

| Category             | Brand                       | Description                     | Avg. pH ( $\pm$ SD) | Panbio result  |                          | Veritor result |                          | RT-PCR result |
|----------------------|-----------------------------|---------------------------------|---------------------|----------------|--------------------------|----------------|--------------------------|---------------|
|                      |                             |                                 |                     | Sample, direct | Swab of sample in buffer | Sample, direct | Swab of sample in buffer |               |
| Food products (n=33) | Bragg                       | Apple cider vinegar             | N/A                 | INV            | NEG                      | INV            | NEG                      | N/A           |
|                      | N/A                         | Lemon, juice (fresh)            | N/A                 | INV            | NEG                      | INV            | NEG                      | N/A           |
|                      | N/A                         | Lime, juice (fresh)             | N/A                 | INV            | NEG                      | INV            | NEG                      | N/A           |
|                      | Nakano                      | Rice vinegar                    | N/A                 | INV            | NEG                      | NEG            | NEG                      | N/A           |
|                      | Natrel                      | Milk, lactose-free              | N/A                 | NEG            | NEG                      | NEG            | NEG                      | N/A           |
|                      | Scotsburn                   | 18% Cream                       | N/A                 | NEG            | NEG                      | NEG            | NEG                      | N/A           |
|                      | Scotsburn                   | Milk, 2%                        | N/A                 | NEG            | NEG                      | NEG            | NEG                      | N/A           |
|                      | Farmer's                    | Milk, 2%                        | N/A                 | POS*           | NEG                      | NEG            | NEG                      | N/A           |
|                      | Farmer's                    | Milk, 1%                        | N/A                 | POS*           | NEG                      | NEG            | NEG                      | N/A           |
|                      | Farmer's                    | Milk, fat-free skim             | N/A                 | POS            | NEG                      | NEG            | NEG                      | N/A           |
|                      | Bubbly                      | Soda                            | N/A                 | POS*           | NEG                      | NEG            | NEG                      | N/A           |
|                      | Pepsi                       | Soda                            | N/A                 | POS*           | NEG                      | NEG            | NEG                      | N/A           |
|                      | Coca-Cola                   | Soda                            | N/A                 | POS*           | NEG                      | NEG            | NEG                      | N/A           |
|                      | Tim Horton's                | Apple juice, pure               | N/A                 | POS*           | NEG                      | NEG            | NEG                      | N/A           |
|                      | Tim Horton's                | Coffee, black                   | N/A                 | POS            | NEG                      | NEG            | NEG                      | N/A           |
|                      | Simply                      | Apple juice, pure pressed       | N/A                 | POS            | NEG                      | NEG            | NEG                      | N/A           |
|                      | N/A                         | Honeycrisp apple, juice (fresh) | N/A                 | POS            | NEG                      | NEG            | NEG                      | N/A           |
|                      | N/A                         | Tangerine, juice (fresh)        | N/A                 | POS            | NEG                      | NEG            | NEG                      | N/A           |
|                      | N/A                         | Watermelon, juice (fresh)       | N/A                 | POS            | NEG                      | NEG            | NEG                      | N/A           |
|                      | N/A                         | Red grapes, juice (fresh)       | N/A                 | POS            | NEG                      | NEG            | NEG                      | N/A           |
| N/A                  | Green grapes, juice (fresh) | N/A                             | POS                 | NEG            | NEG                      | NEG            | N/A                      |               |
| N/A                  | Peach, juice (fresh)        | N/A                             | POS                 | NEG            | NEG                      | NEG            | N/A                      |               |
| N/A                  | Wild blueberries,           | N/A                             | POS                 | NEG            | NEG                      | NEG            | N/A                      |               |

|                      |                     |                                                          |               |     |     |     |     |     |
|----------------------|---------------------|----------------------------------------------------------|---------------|-----|-----|-----|-----|-----|
|                      |                     | juice (fresh)                                            |               |     |     |     |     |     |
|                      | N/A                 | Tomato, juice (fresh)                                    | N/A           | POS | NEG | NEG | NEG | N/A |
|                      | N/A                 | English cucumber, juice (fresh)                          | N/A           | POS | NEG | NEG | NEG | N/A |
|                      | Heinz               | Relish                                                   | N/A           | POS | NEG | NEG | NEG | N/A |
|                      | Heinz               | Ketchup                                                  | N/A           | POS | NEG | NEG | NEG | N/A |
|                      | Heinz               | Mustard                                                  | N/A           | POS | NEG | NEG | NEG | N/A |
|                      | Stellenbosch        | Wine, cabernet                                           | N/A           | POS | NEG | NEG | NEG | N/A |
|                      | Bud Light           | Beer                                                     | N/A           | POS | NEG | NEG | NEG | N/A |
|                      | Fisherman's Helper  | Rum, white                                               | N/A           | POS | NEG | NEG | NEG | N/A |
|                      | Crown Royal         | Maple finished whisky                                    | N/A           | POS | NEG | NEG | NEG | N/A |
|                      | Jameson             | Irish Whiskey                                            | N/A           | POS | NEG | NEG | NEG | N/A |
| Water samples (n=24) | Sigma Life Sciences | Double processed, tissue culture water, sterile filtered | 4.00 (± 0.01) | POS | NEG | NEG | NEG | NEG |
|                      | Montellier          | Carbonated spring water                                  | 4.68 (± 0.00) | POS | NEG | NEG | NEG | NEG |
|                      | Invitrogen          | UltraPure distilled water, Dnase- and Rnase-free         | 4.80 (± 0.01) | POS | NEG | NEG | NEG | NEG |
|                      | Aquafina            | Demineralized water, reverse osmosis                     | 5.05 (± 0.01) | POS | NEG | NEG | NEG | NEG |
|                      | S. Pellegrino       | Carbonated natural mineral water                         | 5.09 (± 0.01) | POS | NEG | NEG | NEG | NEG |
|                      | Canadian Springs    | Distilled water, ozonized                                | 5.31 (± 0.01) | POS | NEG | NEG | NEG | NEG |
|                      | Dasani              | Remineralized water, reverse osmosis treated             | 5.68 (± 0.01) | POS | NEG | NEG | NEG | NEG |
|                      | Big8                | Distilled water,                                         | 6.25 (±       | POS | NEG | NEG | NEG | NEG |



|  |               |                                                                                                 |               |     |     |     |     |     |
|--|---------------|-------------------------------------------------------------------------------------------------|---------------|-----|-----|-----|-----|-----|
|  |               | ozonated                                                                                        | 0.01)         |     |     |     |     |     |
|  | Big8          | Spring water, ozonated                                                                          | 6.26 (± 0.01) | POS | NEG | NEG | NEG | NEG |
|  | Glaceau Smart | Vapour distilled water with added electrolytes                                                  | 6.71 (± 0.02) | POS | NEG | NEG | NEG | NEG |
|  | N/A           | Municipal water (Halifax, Nova Scotia, May12, 2021)                                             | 6.75 (± 0.02) | POS | NEG | NEG | NEG | NEG |
|  | Fiji          | Natural spring water, tropical rain filtered through volcanic rock                              | 7.25 (± 0.02) | POS | NEG | NEG | NEG | NEG |
|  | Simple Drop   | Natural spring water                                                                            | 7.26 (± 0.02) | POS | NEG | NEG | NEG | NEG |
|  | Pathwater     | Purified water, reverse osmosis treated, ozonated, and electrolytes added, pH-balanced, pH 7.5+ | 7.27 (± 0.01) | POS | NEG | NEG | NEG | NEG |
|  | Art Life WTR  | Purified water, mineralized and electrolytes added, pH-balanced                                 | 7.28 (± 0.01) | POS | NEG | NEG | NEG | NEG |
|  | Evian         | Spring water, natural electrolytes, pH 7.2                                                      | 7.39 (± 0.02) | POS | NEG | NEG | NEG | NEG |
|  | N/A           | Rain water (Halifax, Nova Scotia, May 12, 2021)                                                 | 7.47 (± 0.01) | POS | NEG | NEG | NEG | NEG |
|  | Icelandic     | Natural spring                                                                                  | 7.58          | POS | NEG | NEG | NEG | NEG |

|                                     |                     |                                                               |                    |            |     |     |     |     |
|-------------------------------------|---------------------|---------------------------------------------------------------|--------------------|------------|-----|-----|-----|-----|
|                                     | Glacial             | water                                                         | ( $\pm$ 0.02)      |            |     |     |     |     |
|                                     | Nestle Pure Life    | Natural spring water, ozonated                                | 7.75 ( $\pm$ 0.02) | POS        | NEG | NEG | NEG | NEG |
|                                     | Earth Group         | Spring water                                                  | 7.80 ( $\pm$ 0.03) | POS        | NEG | NEG | NEG | NEG |
|                                     | Eska                | Natural spring water, pH 7.4                                  | 7.81 ( $\pm$ 0.00) | POS        | NEG | NEG | NEG | NEG |
|                                     | #Smart Moodwater    | Naturally alkaline spring water, pH 8+                        | 7.91 ( $\pm$ 0.01) | POS        | NEG | NEG | NEG | NEG |
|                                     | Flow                | Naturally alkaline spring water, pH 8.1                       | 8.02 ( $\pm$ 0.00) | POS        | NEG | NEG | NEG | NEG |
|                                     | Glaceau Smart       | Mineralized treated water, alkaline pH 9+                     | 9.33 ( $\pm$ 0.00) | POS        | NEG | NEG | NEG | NEG |
| Laboratory buffers and media (n=14) | Teligent            | 0.9% Saline                                                   | 5.62 ( $\pm$ 0.02) | POS (weak) | NEG | NEG | NEG | NEG |
|                                     | Boston BioProducts  | 0.5M Pipes buffer, pH 6.8                                     | 6.66 ( $\pm$ 0.01) | POS*       | NEG | NEG | NEG | NEG |
|                                     | FisherScientific    | 10 mM Tris-HCl; 1 mM EDTA (TE) buffer, molecular-grade pH 7.4 | 7.14 ( $\pm$ 0.01) | POS        | NEG | NEG | NEG | NEG |
|                                     | Sigma Life Sciences | Dulbecco's Phosphate Buffered Saline (PBS)                    | 7.18 ( $\pm$ 0.01) | POS*       | NEG | NEG | NEG | NEG |
|                                     | LiofilChem          | Viral Transport Media (VTM)                                   | 7.24 ( $\pm$ 0.01) | POS*       | NEG | NEG | NEG | NEG |
|                                     | Redoxica            | Viral Transport Media (VTM) with fetal bovine serum (FBS)     | 7.33 ( $\pm$ 0.01) | POS*       | NEG | NEG | NEG | NEG |
|                                     | Becton Dickinson    | Veritor sample buffer                                         | 7.33 ( $\pm$ )     | NEG        | NEG | NEG | NEG | NEG |

|                            |                   |                                             |               |              |     |     |     |     |
|----------------------------|-------------------|---------------------------------------------|---------------|--------------|-----|-----|-----|-----|
|                            |                   |                                             | 0.00)         |              |     |     |     |     |
|                            | Copan Diagnostics | Universal Transport Medium (UTM)            | 7.37 (± 0.01) | NEG          | NEG | NEG | NEG | NEG |
|                            | Yokon             | Universal Transport Medium (UTM)            | 7.44 (± 0.01) | NEG          | NEG | NEG | NEG | NEG |
|                            | Gibco             | RPMI medium 1640, with HEPES                | 7.48 (± 0.01) | NEG          | NEG | NEG | NEG | NEG |
|                            | Genesis           | KaiBiLi Extended ViralTrans, includes HEPES | 7.50 (± 0.01) | NEG          | NEG | NEG | NEG | NEG |
|                            | Gibco             | Minimal Essential Media (MEM)               | 7.83 (± 0.01) | NEG          | NEG | NEG | NEG | NEG |
|                            | Gibco             | 1x Phosphate Buffered Saline (PBS), pH 7.4  | 8.20 (± 0.01) | NEG          | NEG | NEG | NEG | NEG |
|                            | Abbott            | Panbio sample buffer                        | 8.78 (± 0.01) | NEG          | NEG | NEG | NEG | NEG |
| Clinical specimens (n=120) | N/A               | NP swabs in UTM (n=30)                      | N/A           | POS* (28/30) | NEG | NEG | NEG | NEG |
|                            | N/A               | OP/N swabs in PBS (n=30)                    | N/A           | POS* (26/30) | NEG | NEG | NEG | NEG |
|                            | N/A               | BALs (n=30)                                 | N/A           | POS* (27/30) | NEG | NEG | NEG | NEG |
|                            | N/A               | Saline gargles (n=30)                       | N/A           | POS* (27/30) | NEG | NEG | NEG | NEG |

2 \*Only weak positive reactions were observed.

A)

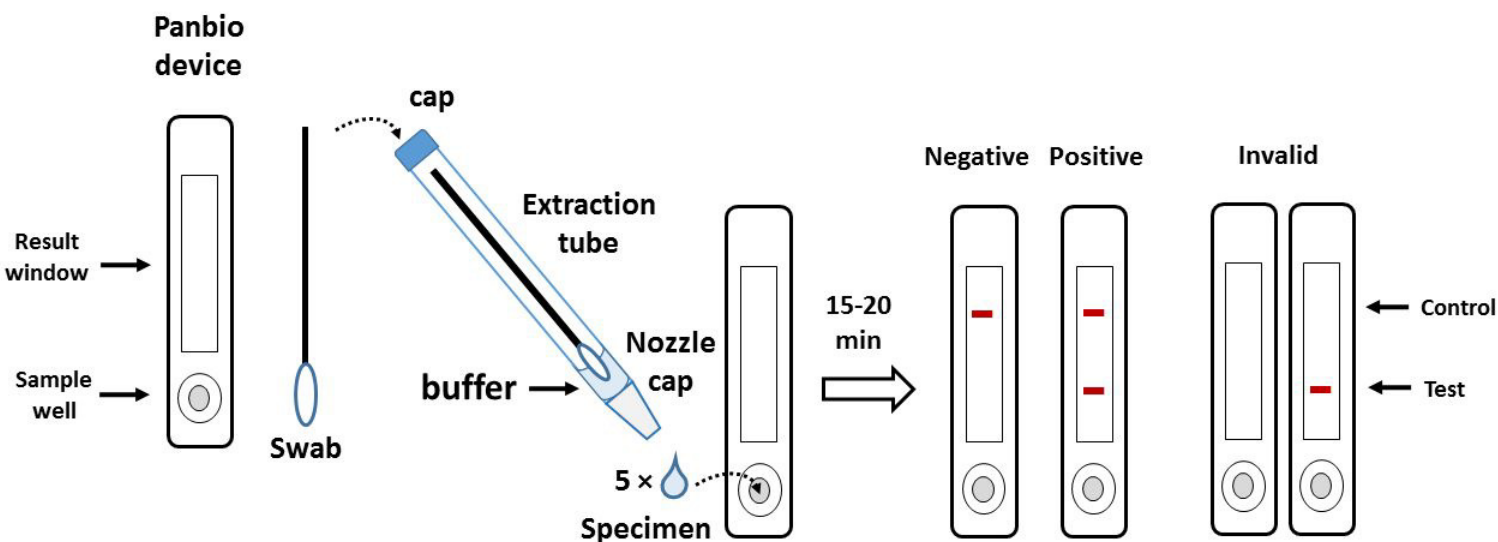

B)

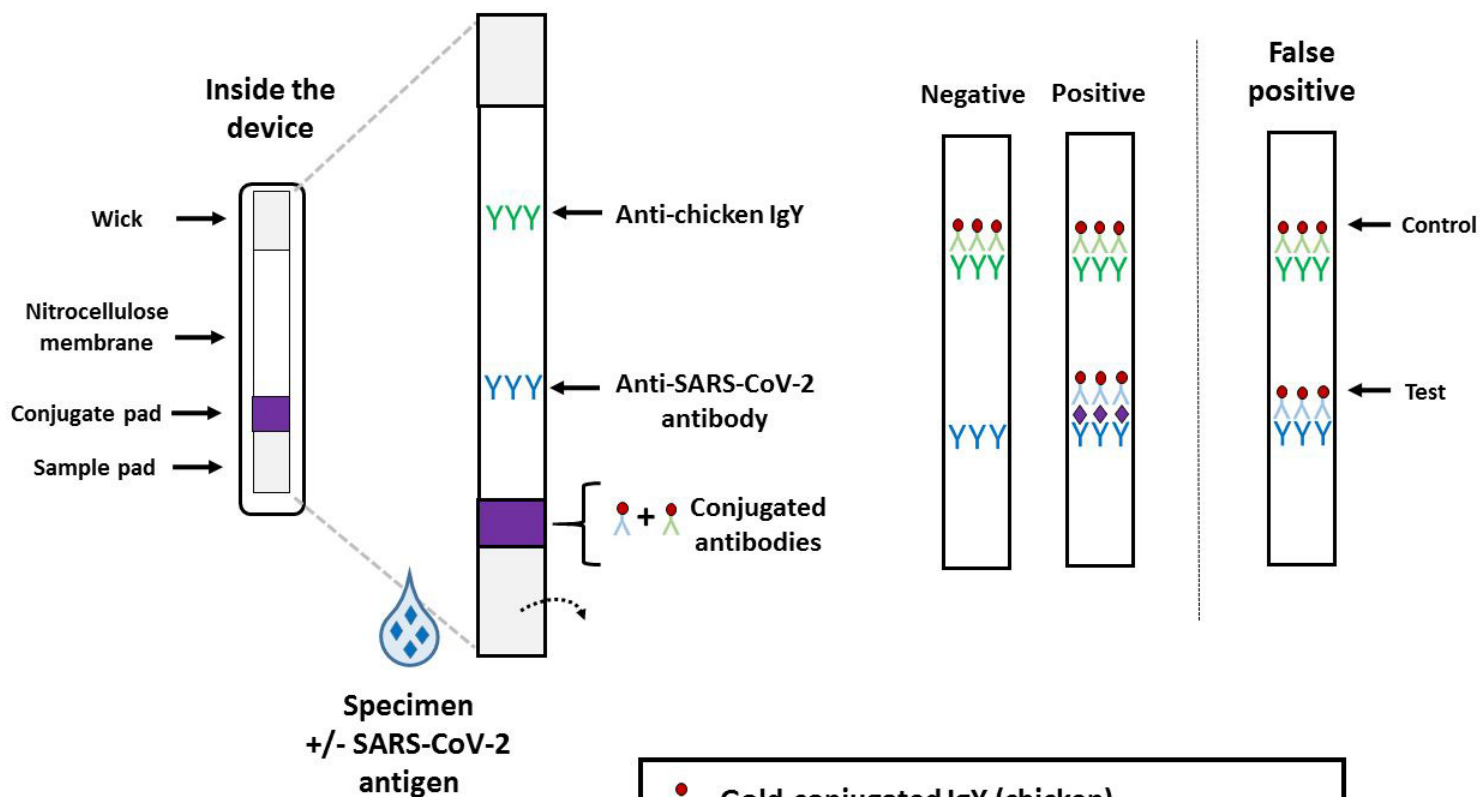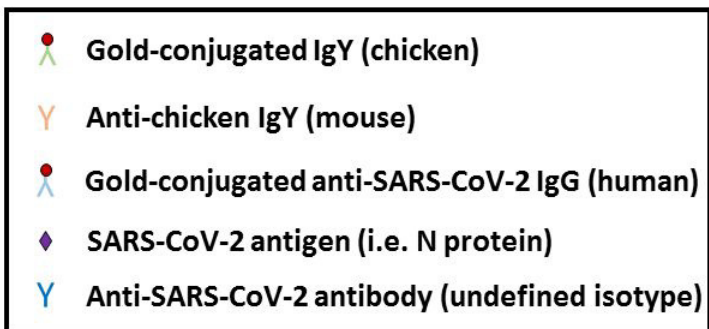

A)

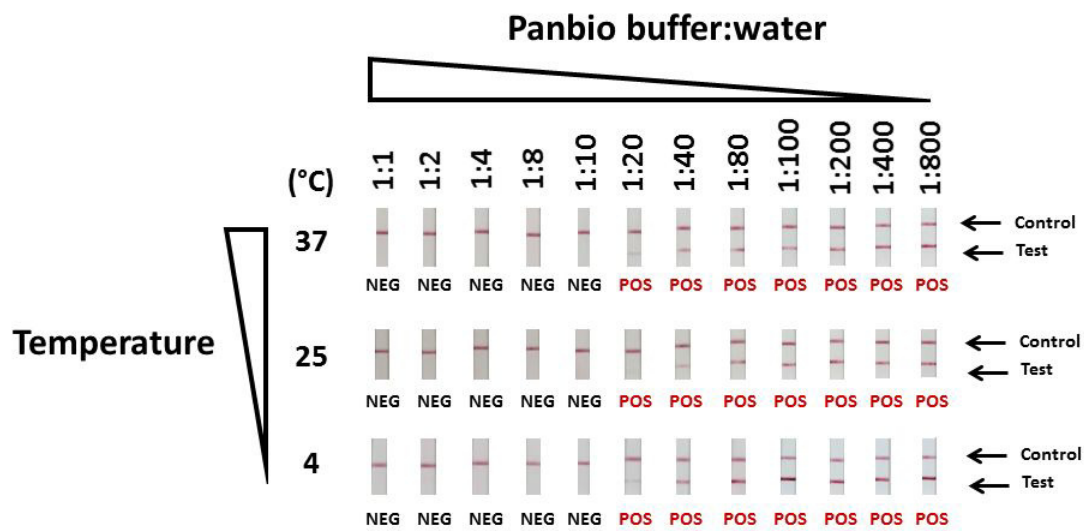

B)

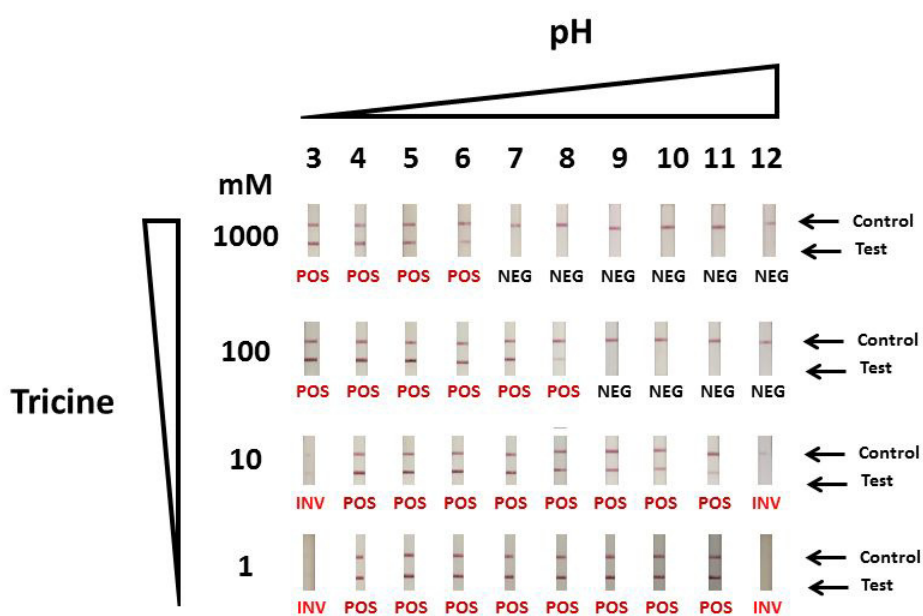

C)

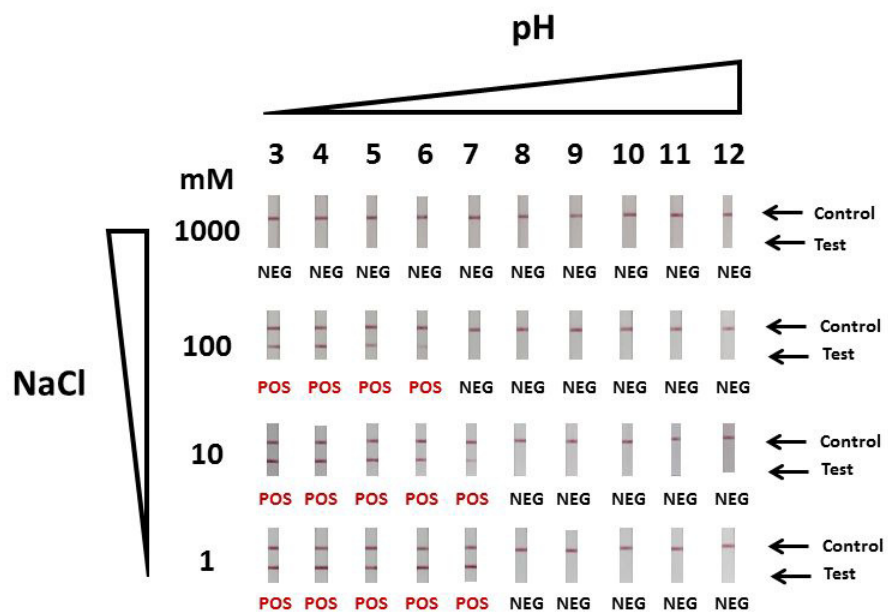

## A) Conjugate pad transplantation

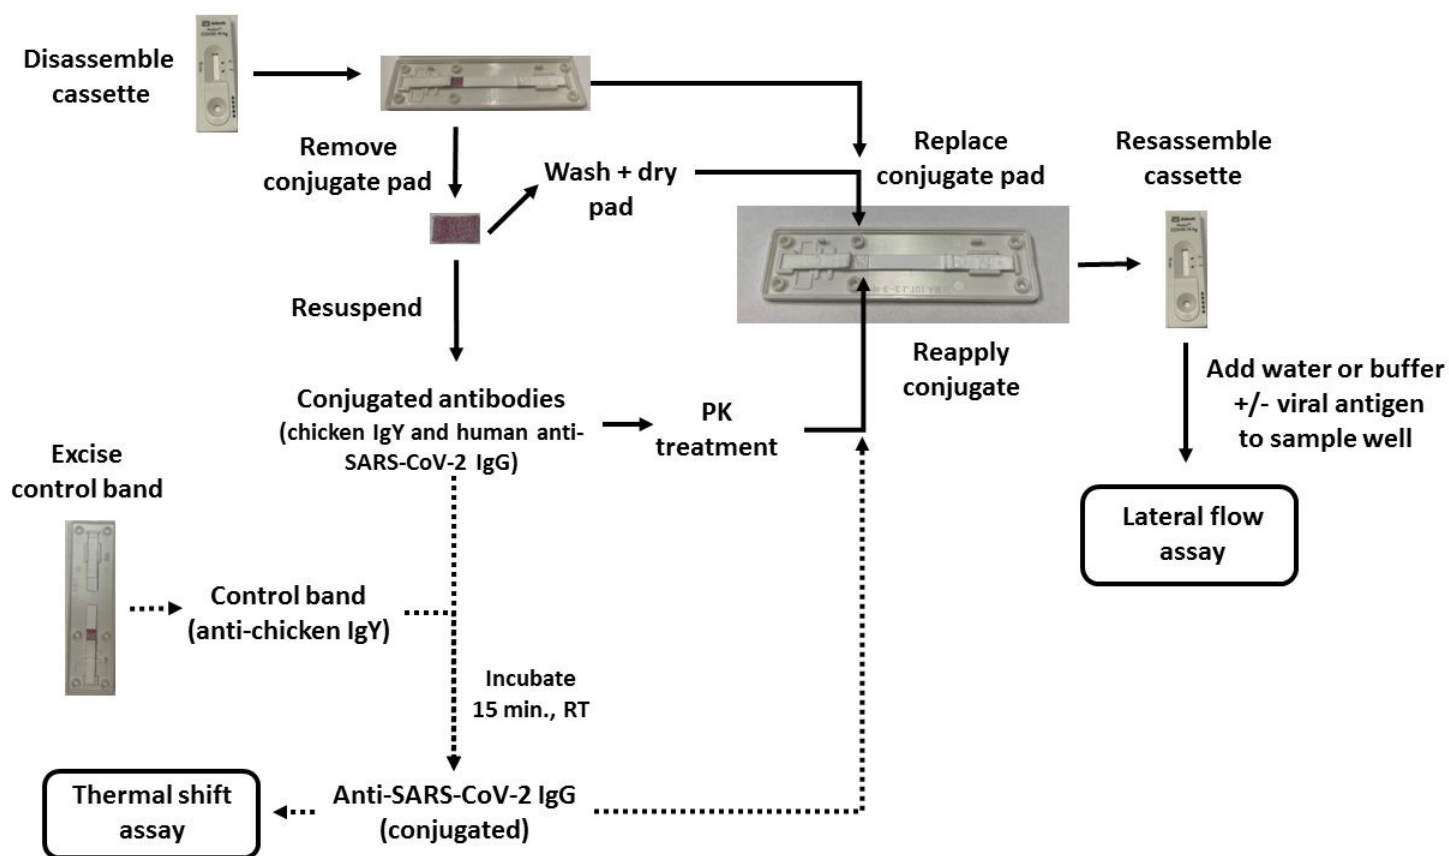

## B) PK and heat treatment

Buffer  
+ negative swab

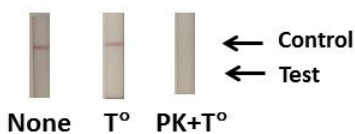

Buffer  
+ positive swab

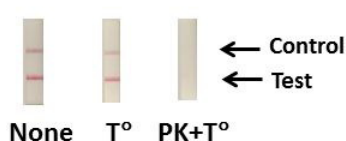

Water  
+ negative swab

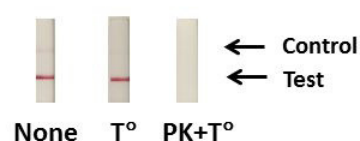

## C) IgY removal

Buffer  
+ negative swab

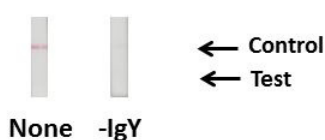

Buffer  
+ positive swab

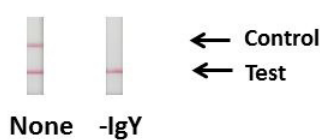

Water  
+ negative swab

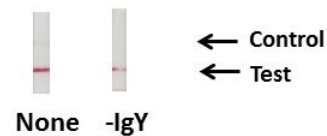

**A)**

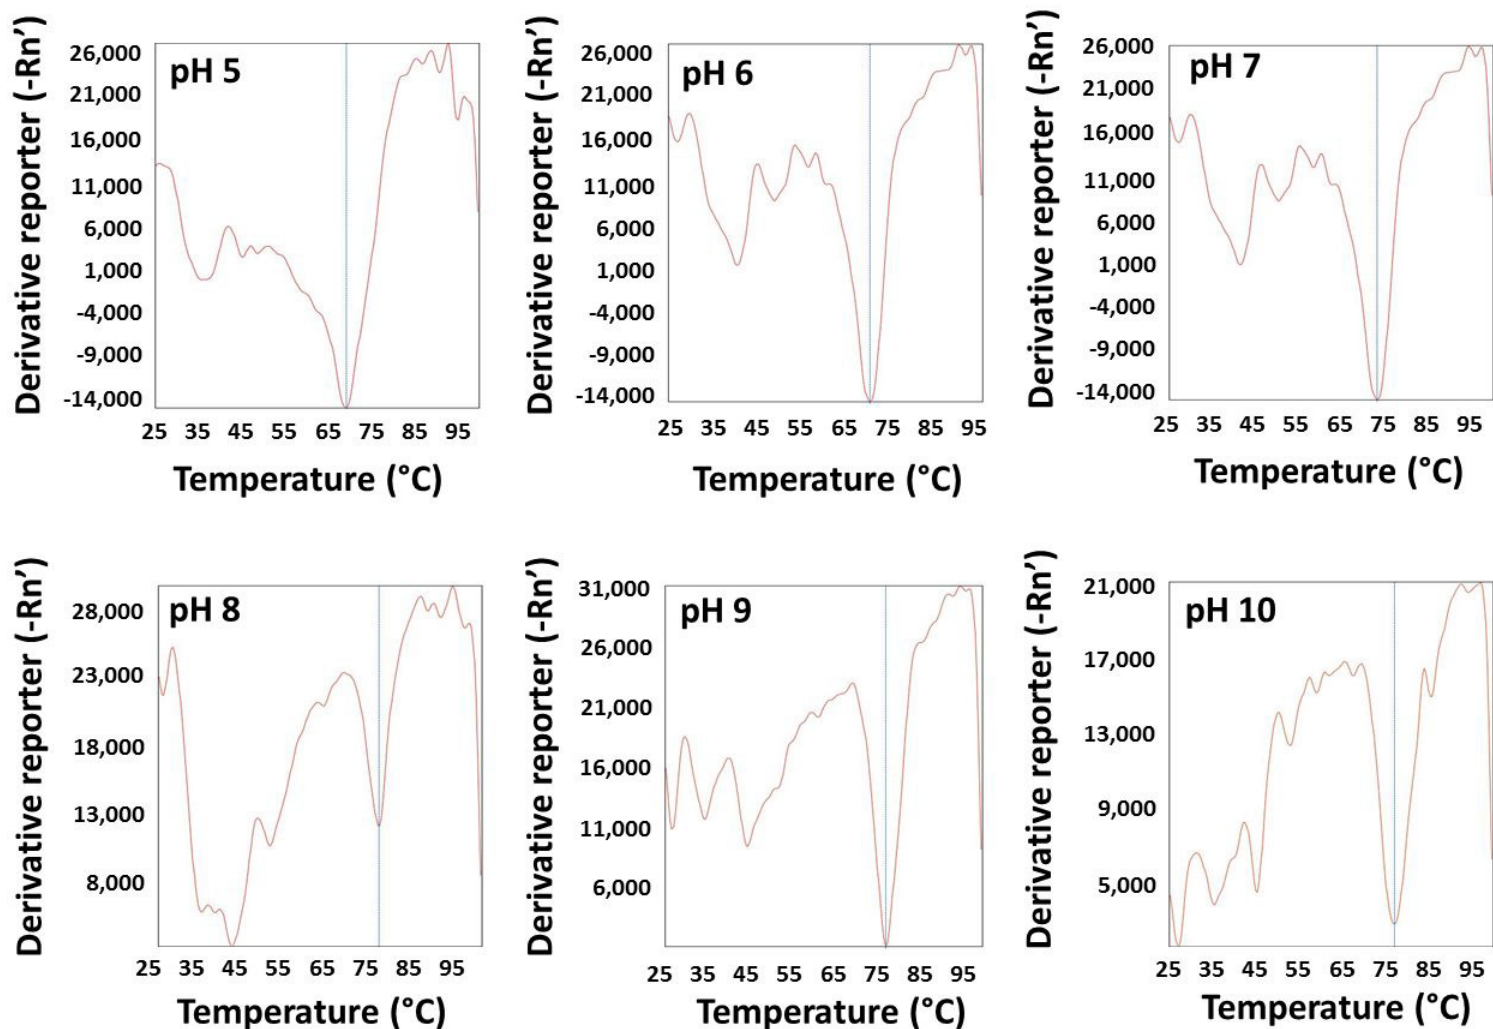

**B)**

| Tricine concentration (mM) | Artifact formation* | pH value | T <sub>m</sub> (°C) |
|----------------------------|---------------------|----------|---------------------|
| 100 mM                     | YES                 | 5.0      | 69.9                |
|                            | YES                 | 6.0      | 72.2                |
|                            | YES                 | 7.0      | 72.2                |
|                            | NO**                | 8.0      | 75.4                |
|                            | NO                  | 9.0      | 76.1                |
|                            | NO                  | 10.0     | 76.2                |

\*The lateral flow assay was performed in parallel as the thermal shift assays.

\*\*With 100 mM tricine at pH 8.0, an weak band is occasionally observed.
